# Supplementary material for: Pharmacological treatment strategies for antipsychotic-induced hyperprolactinemia: a systematic review and network meta-analysis
Source: PubMed Central journal article supplement (PMC9256633; doi:10.1038/s41398-022-02027-4), 2022-07-05
Supplement: 41398_2022_2027_MOESM1_ESM.pdf [file 41398_2022_2027_MOESM1_ESM.pdf]

# Supplementary Appendix

## Supplementary Figures

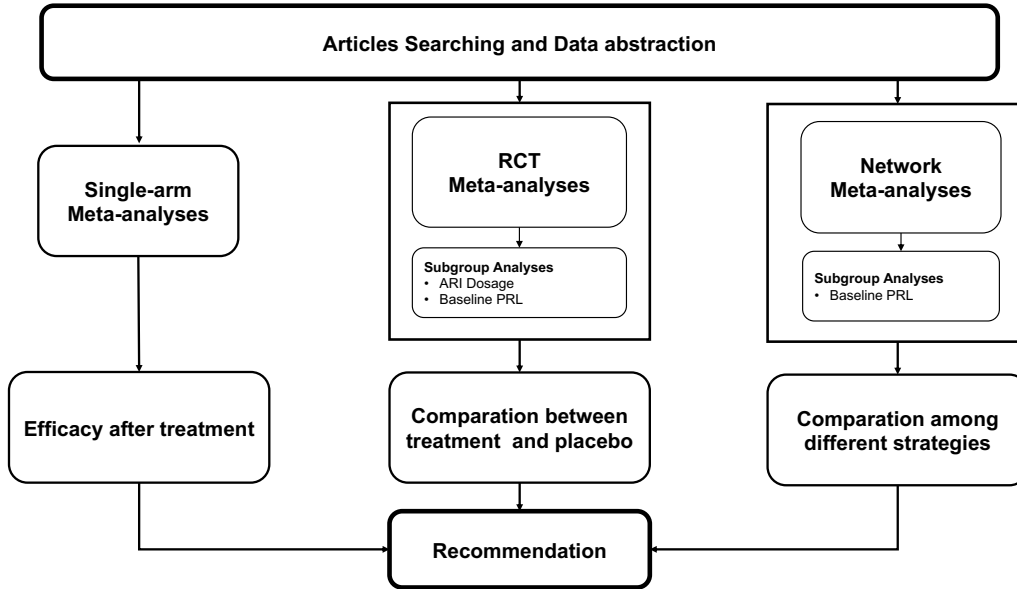

Supplementary Figure 1. Study framework.

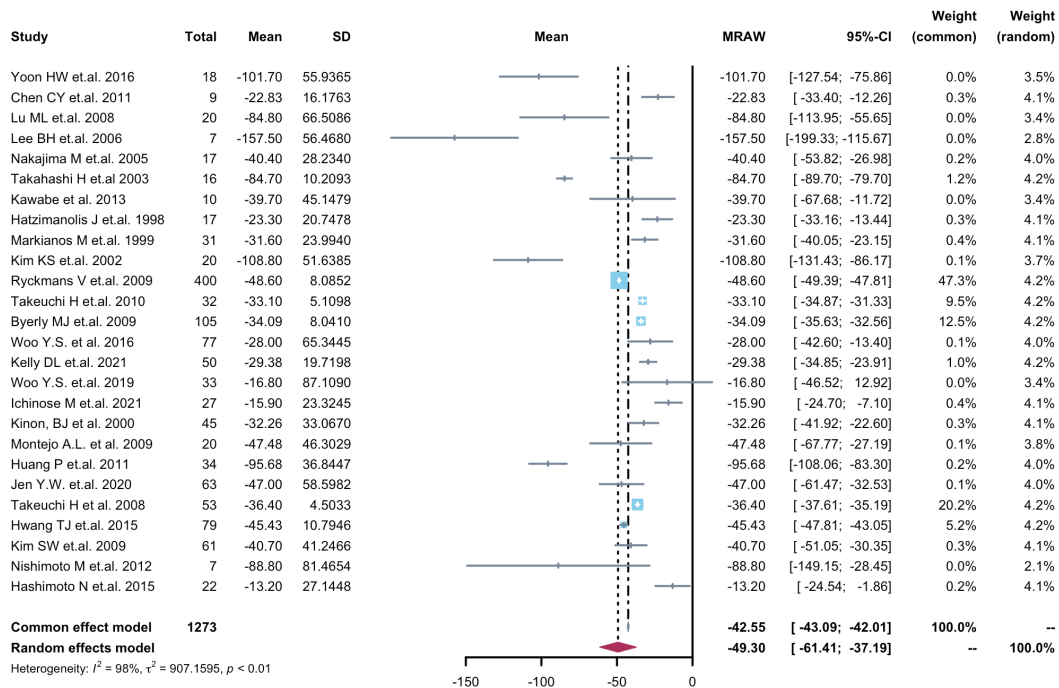

Supplementary Figure 2. Forest plot of single-arm meta-analysis on switching to another antipsychotic.

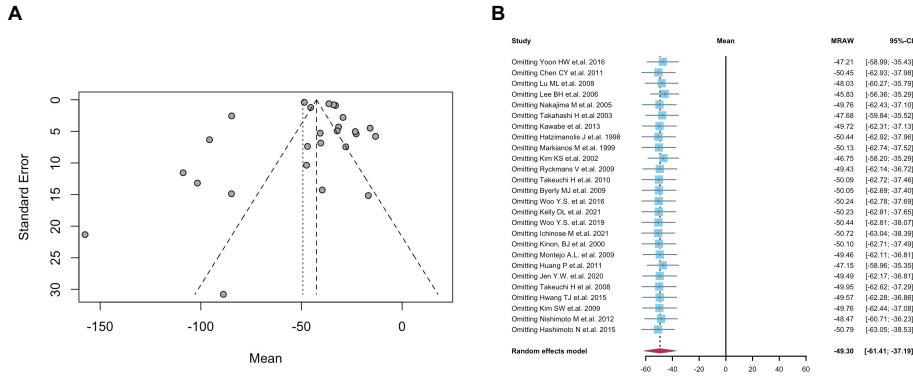

**Supplementary Figure 3. A, Funnel plot of single-arm meta-analysis on switching to another antipsychotic; B, Sensitive analysis.**

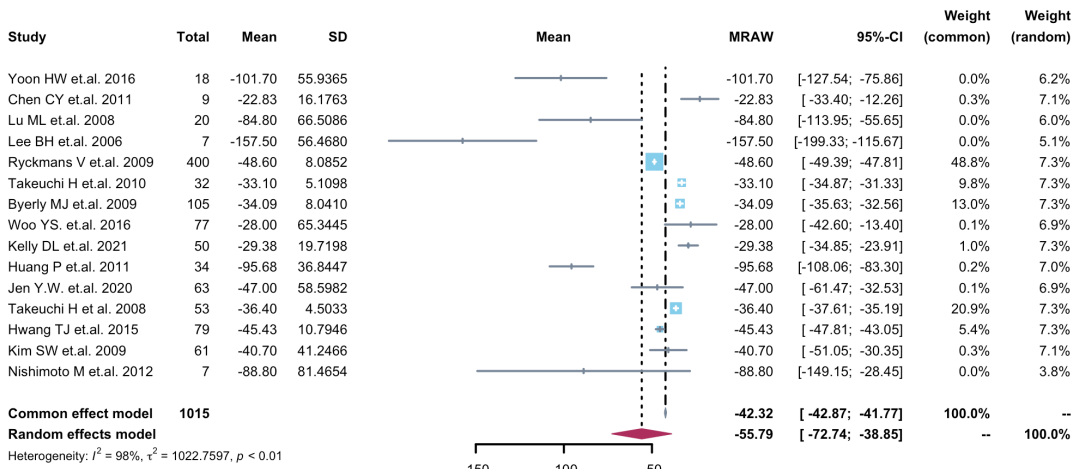

**Supplementary Figure 4. Forest plot of single-arm meta-analysis on switching to aripiprazole.**

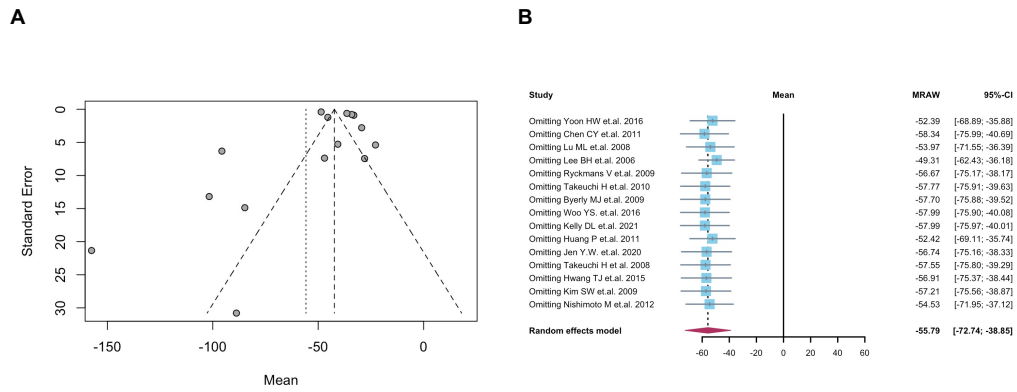

**Supplementary Figure 5. A, Funnel plot of single-arm meta-analysis on switching to aripiprazole; B, Sensitive analysis.**

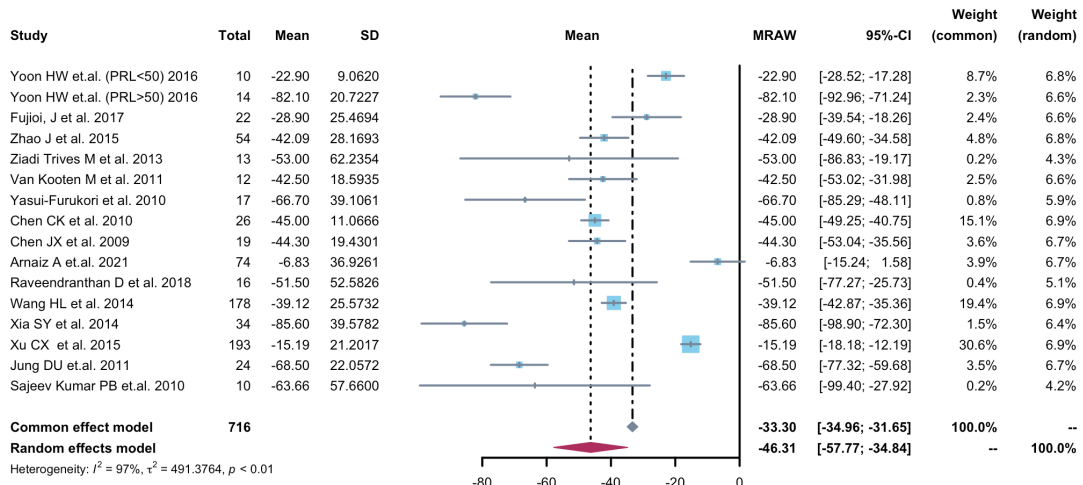

**Supplementary Figure 6. Forest plot of single-arm meta-analysis on adjunctive aripiprazole.**

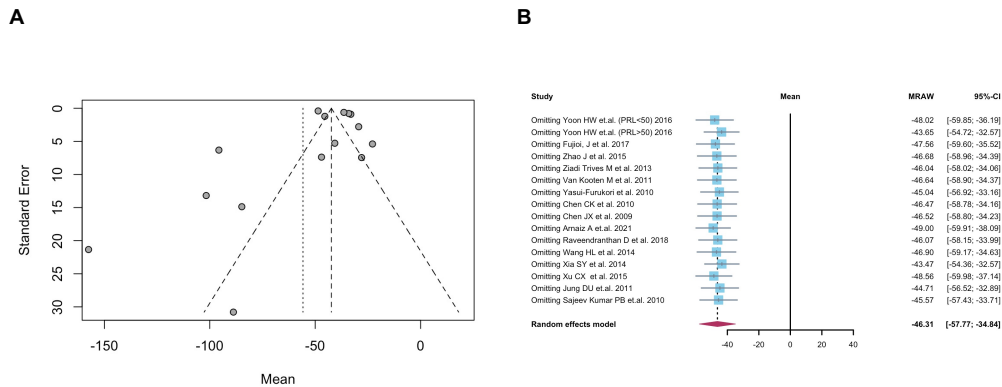

**Supplementary Figure 7. A, Funnel plot of single-arm meta-analysis on adjunctive aripiprazole; B, Sensitive analysis.**

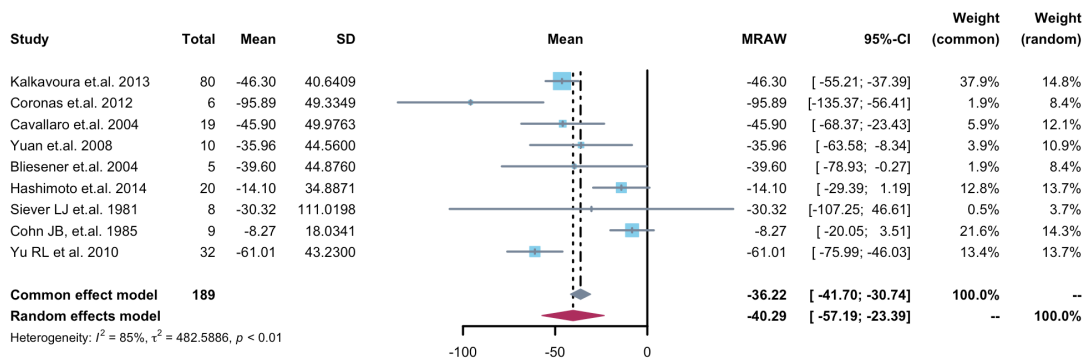

**Supplementary Figure 8. Forest plot of single-arm meta-analysis on adjunctive dopamine agonist.**

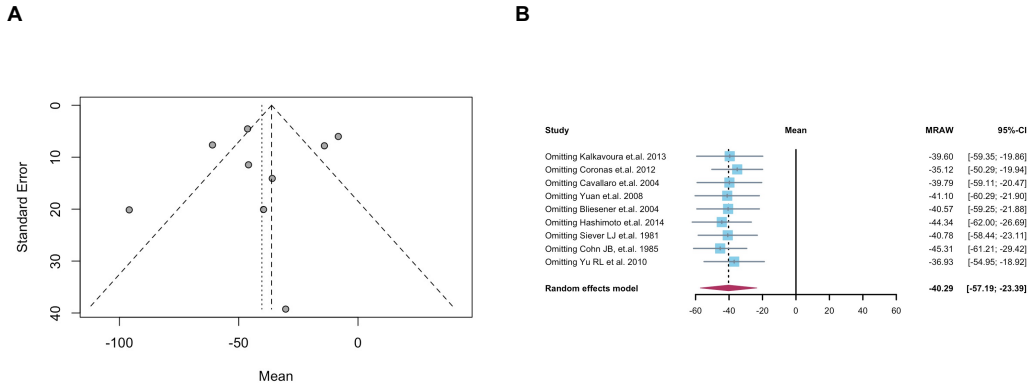

**Supplementary Figure 9. A, Funnel plot of single-arm meta-analysis on adjunctive dopamine agonist; B, Sensitive analysis.**

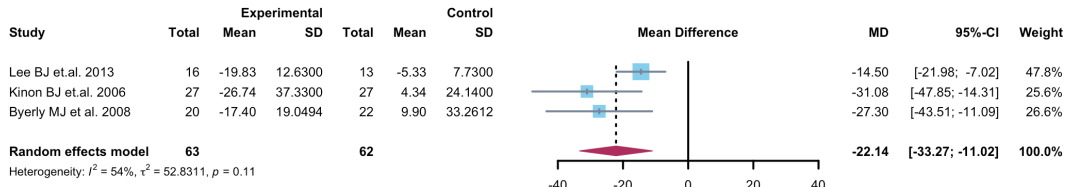

**Supplementary Figure 10. Forest plot of RCT meta-analysis on switching to another antipsychotic.**

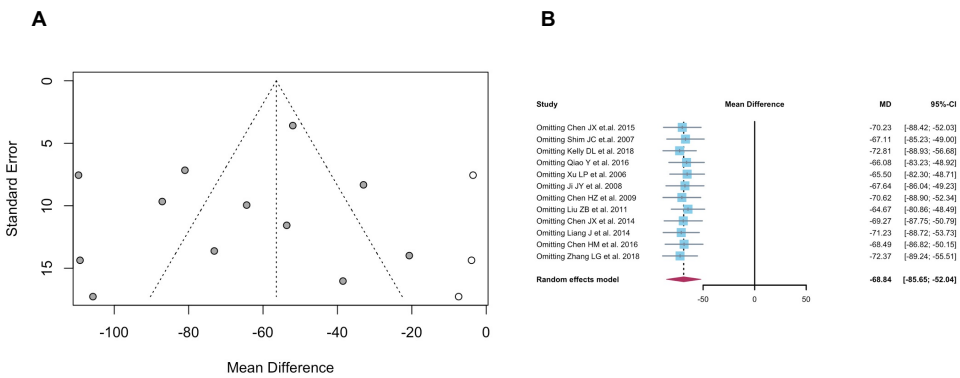

**Supplementary Figure 11. A, Funnel plot of RCT meta-analysis on adjunctive aripiprazole; B, Sensitive analysis.**

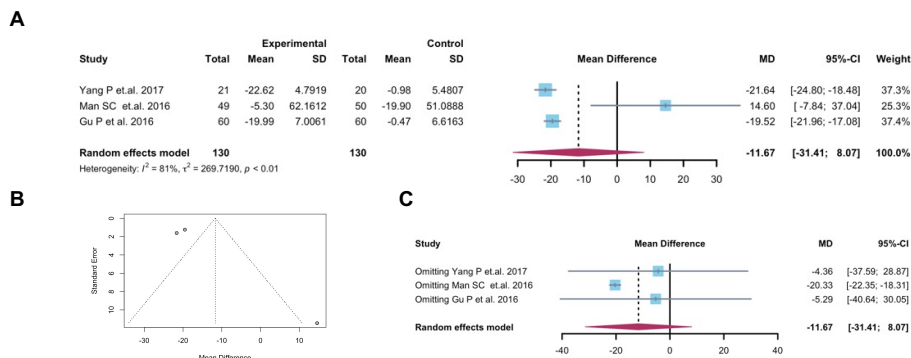

Supplementary Figure 12. A, forest plot of RCT meta-analysis on adjunctive Peony-Glycyrrhiza decoction; B, Funnel plot of RCT meta-analysis on adjunctive aripiprazole; C, Sensitive analysis.

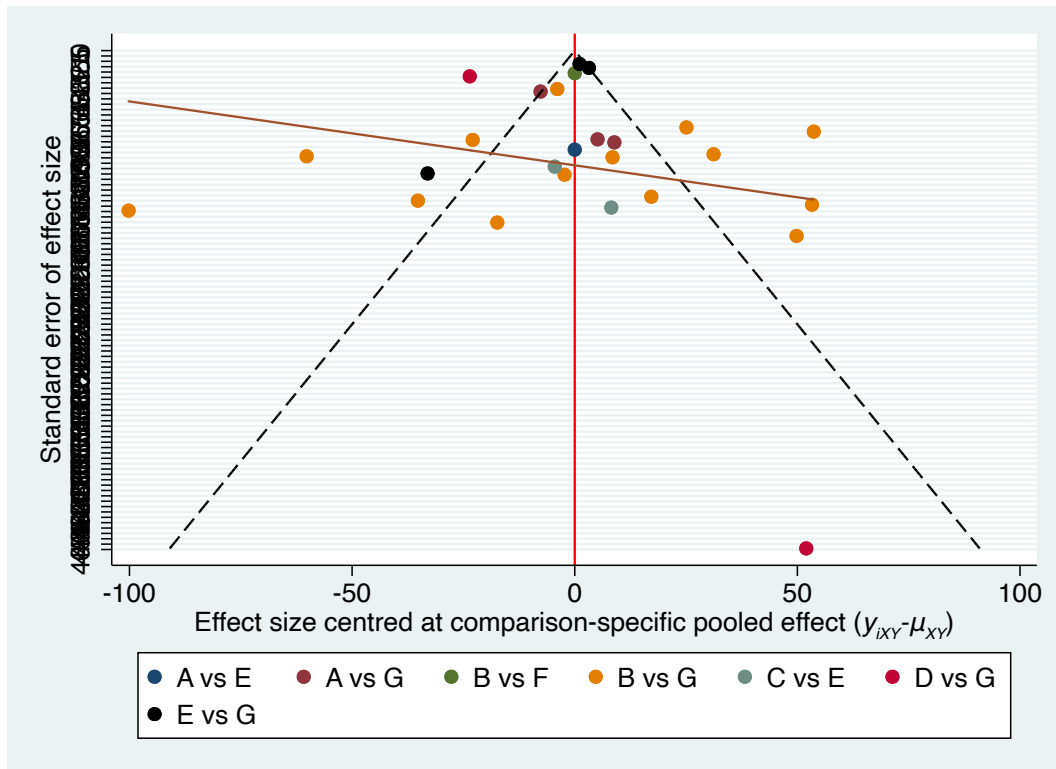

Supplementary Figure 13. Funnel plot of network meta-analysis: all strategies. A, switching to another antipsychotic; B, adjunctive aripiprazole; C, adjunctive dopamine agonist; D, adjunctive metformin; E, adjunctive Peony-Glycyrrhiza decoction; F, placebo.

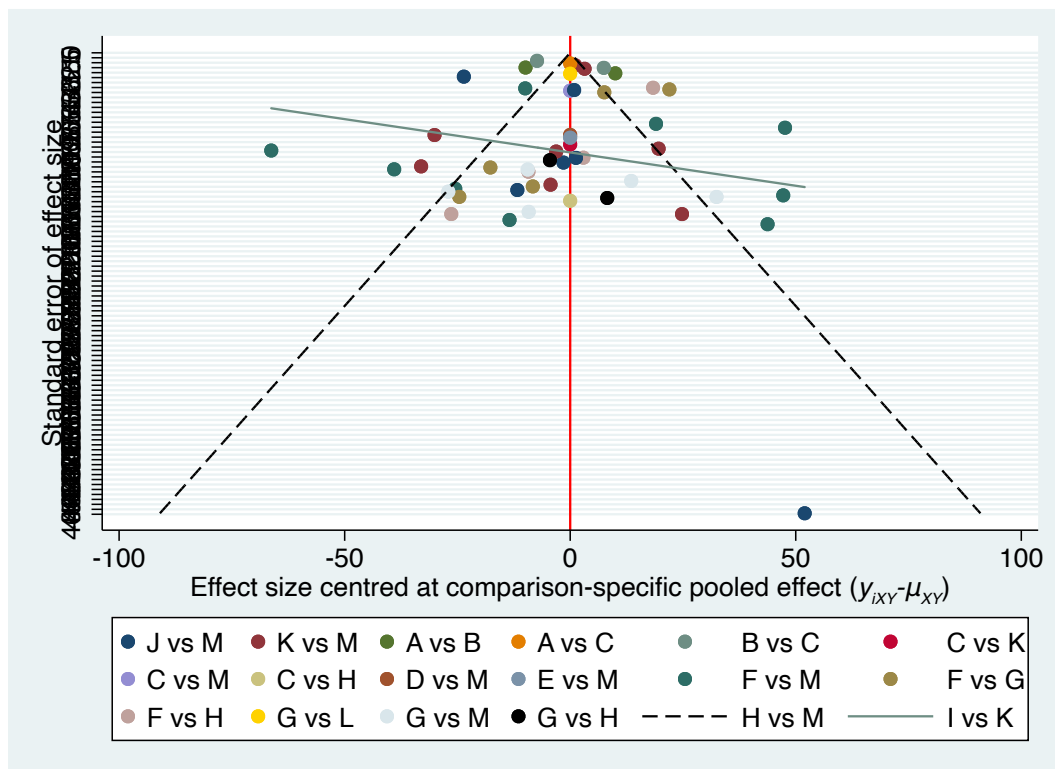

**Supplementary Figure 14. Funnel plot of network meta-analysis: based on different dosage and switching options.**

A, switching to ARI with fixed dosage and reducing the previous antipsychotic immediately; B, switching to ARI with fixed dosage and reducing the previous antipsychotic in tardation; C, switching to ARI in titration and reducing the previous antipsychotic in tardation; D, switching to quetiapine; E, switching to olanzapine; F, adjunctive 5mg aripiprazole; G, adjunctive 10mg aripiprazole; H, adjunctive more than 10mg aripiprazole; I, adjunctive dopamine agonist; J, adjunctive metformin; K, adjunctive Peony-Glycyrrhiza decoction; L, adjunctive high-dose vitamin B6; M, placebo.

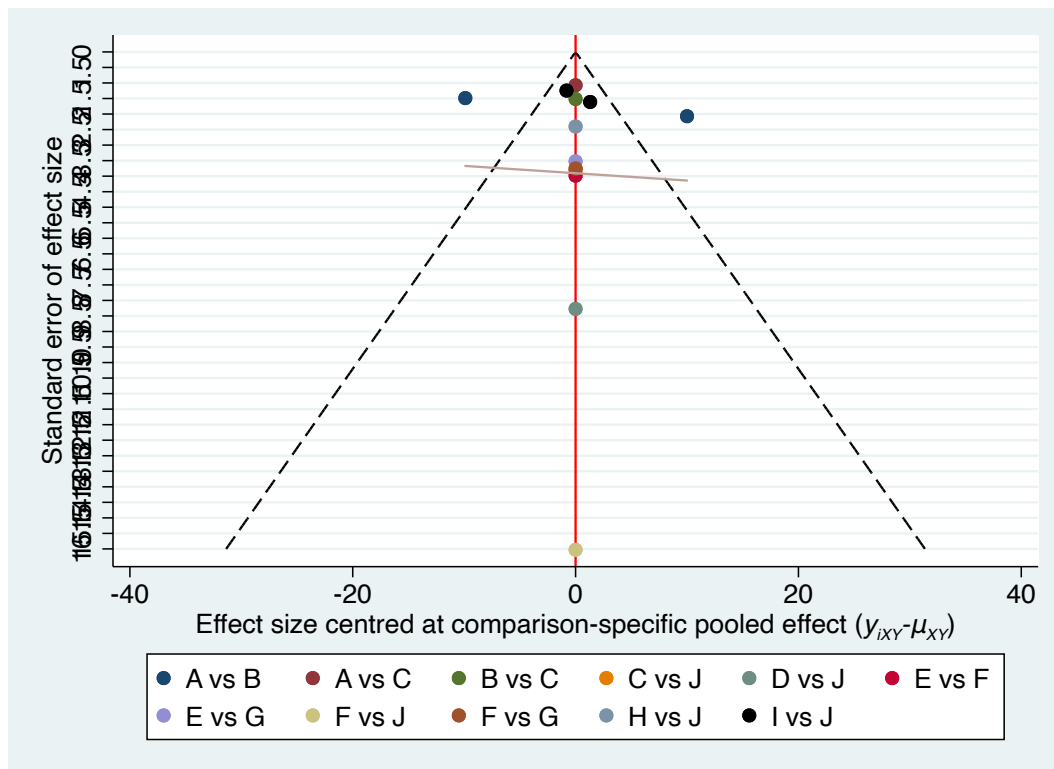

**Supplementary Figure 15. Funnel plot of network meta-analysis: baseline prolactin < 50 ng/ml.**

A, switching to ARI with fixed dosage and reducing the previous antipsychotic immediately; B, switching to ARI with fixed dosage and reducing the previous antipsychotic in tardation; C, switching to ARI in titration and reducing the previous antipsychotic in tardation; D, switching to quetiapine; E, adjunctive 5mg aripiprazole; F, adjunctive 10mg aripiprazole; G, adjunctive more than 10mg aripiprazole; H, adjunctive dopamine agonist; I, adjunctive Peony-Glycyrrhiza decoction; J, placebo.

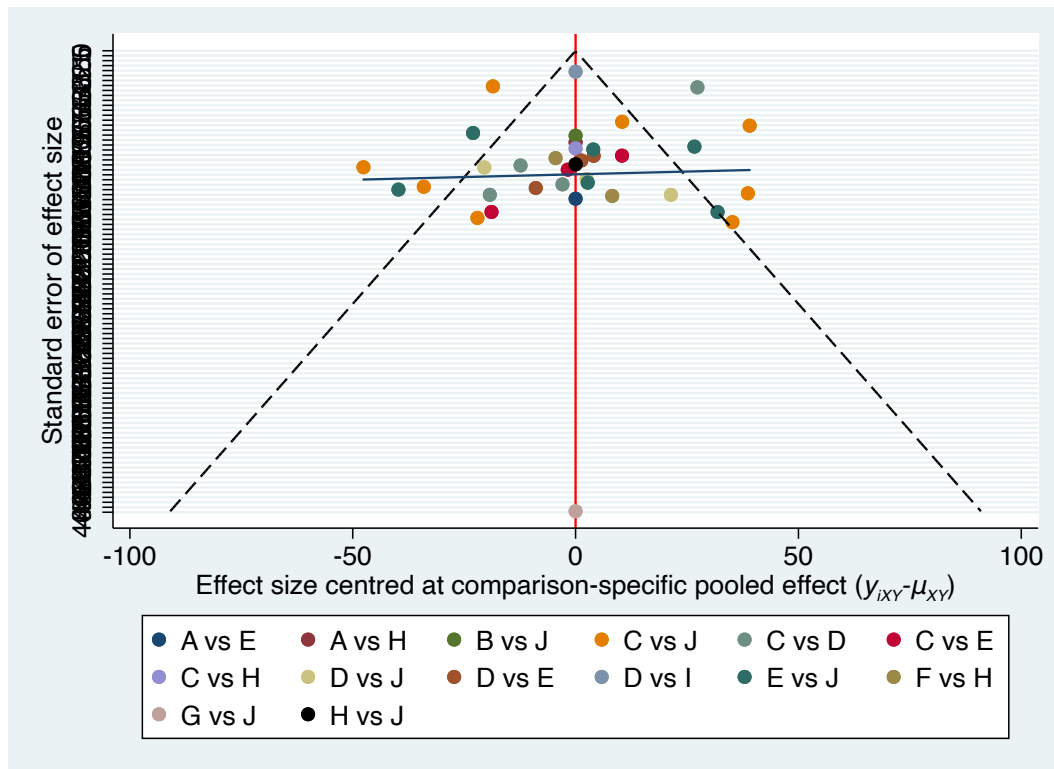

**Supplementary Figure 16. Funnel plot of network meta-analysis: baseline prolactin > 50 ng/ml.**

A, switching to ARI in titration and reducing the previous antipsychotic in tardation; B, switching to olanzapine; C, adjunctive 5mg aripiprazole; D, adjunctive 10mg aripiprazole; E, adjunctive more than 10mg aripiprazole; F, adjunctive dopamine agonist; G, adjunctive metformin; H, adjunctive Peony-Glycyrrhiza decoction; I, adjunctive high-dose vitamin B6; J, placebo.

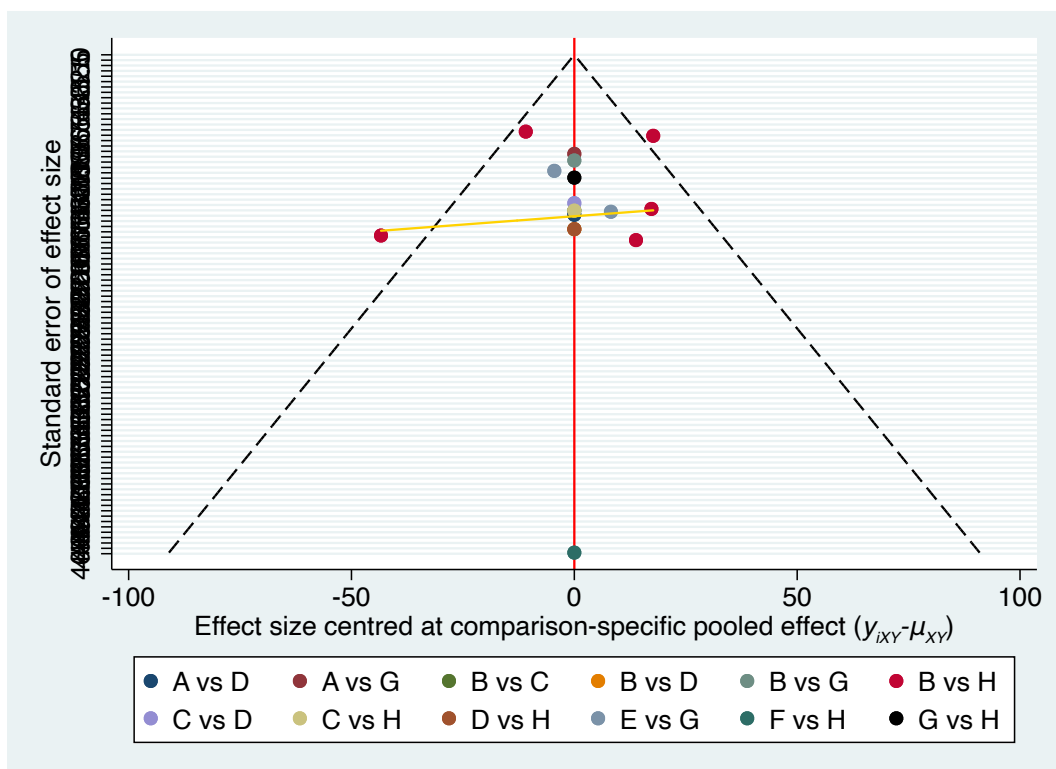

**Supplementary Figure 17. Funnel plot of network meta-analysis: baseline prolactin > 100 ng/ml.**

A, switching to ARI in titration and reducing the previous antipsychotic in tardation; B, adjunctive 5mg aripiprazole; C, adjunctive 10mg aripiprazole; D, adjunctive more than 10mg aripiprazole; E, adjunctive dopamine agonist; F, adjunctive metformin; G, adjunctive Peony-Glycyrrhiza decoction; H, placebo.

### **Supplementary Results**

In the subgroup of 50 to 100 ng/ml, 5 strategies including adjunctive 5mg ARI, adjunctive 10mg ARI, adjunctive more than 10mg ARI, switching to OLA and adjunctive vitamin B6 were included (9 studies with 881 participants). When compare to the placebo, adjunctive ARI (5mg: MD = -43.84, 95% CI = -66.85 to -18.27; 10mg: MD = -43.90, 95% CI = -68.51 to -19.22; more than 10mg: MD = -61.42, 95% CI = -84.81 to -38.20) and vitamin B6 (MD = -75.95, 95% CI = -125.74 to -26.13) showed the significant effect of decreasing PRL level, while the difference of PRL reduction between switching to OLA and placebo was not significant.



## Supplementary Tables

**Supplementary Table 1. Summary of findings tables**

| Summary of findings tables                                    |                                             |                              |                                                          |
|---------------------------------------------------------------|---------------------------------------------|------------------------------|----------------------------------------------------------|
| Outcomes                                                      | Intervention                                | MD (95% CI) Network estimate | Certainty of evidence                                    |
| Reduction of prolactin level from baseline                    | ARI<br>(15 RCTs, 694 participants)          | -60.21 (-78.36, -41.89)      | ⊕⊕⊕⊕ High                                                |
|                                                               | VitB6<br>(1 RCT, 100 participants)          | -91.98 (-159.55, -25.78)     | ⊕⊕⊕○ Moderate Due to indirectness                        |
|                                                               | Switching<br>(5 RCTs, 115 participants)     | -38.23 (-68.76, -8.04)       | ⊕⊕⊕○ Moderate Due to risk of bias                        |
|                                                               | MET<br>(2 RCTs, 114 participants)           | -18.49 (-75.91, 34.31)       | ⊕⊕○○ Low Due to severe imprecision                       |
|                                                               | PGD<br>(7 RCTs, 236 participants)           | -26.77 (-56.82, 3.17)        | ⊕⊕○○ Low Due to heterogeneity and imprecision            |
|                                                               | DA<br>(2 RCTs, 42 participants)             | -31.69 (-89.00, 25.92)       | ⊕○○○ Very low Due to indirectness and severe imprecision |
|                                                               | Placebo                                     | Reference comparator         | Reference comparator                                     |
| Reduction of prolactin level from baseline (stratified by the | ARI_more_10mg<br>(8 RTCs, 346 participants) | -62.07 (-84.71, -39.59)      | ⊕⊕⊕⊕ High                                                |
|                                                               | ARI_5mg<br>(11 RTCs, 486 participants)      | -61.21 (-80.23, -42.33)      | ⊕⊕⊕⊕ High                                                |

|                                                   |                                                   |                          |                                                          |
|---------------------------------------------------|---------------------------------------------------|--------------------------|----------------------------------------------------------|
| dosage of ARI and different Switching strategies) | ARI_10mg<br>(7 RTCs, 233 participants)            | -55.97 (-78.66, -33.14)  | ⊕⊕⊕⊕ High                                                |
|                                                   | Switch_ARI_ti_ta<br>(5 RTCs, 303 participants)    | -44.53 (-81.76, -7.98)   | ⊕⊕⊕○ Moderate Due to risk of bias                        |
|                                                   | PGD<br>(7 RCTs, 236 participants)                 | -27.84 (-55.23, -0.29)   | ⊕⊕⊕○ Moderate Due to heterogeneity                       |
|                                                   | Switch_OLA<br>(1 RCT, 27 participants)            | -31.11 (-90.13, 27.60)   | ⊕⊕○○ Low Due to severe imprecision                       |
|                                                   | Switch_QUE<br>(1 RCT, 20 participants)            | -27.24 (-86.89, 32.31)   | ⊕⊕○○ Low Due to severe imprecision                       |
|                                                   | MET<br>(2 RCTs, 114 participants)                 | -16.62 (-68.67, 31.29)   | ⊕⊕○○ Low Due to severe imprecision                       |
|                                                   | VitB6<br>(1 RCT, 100 participants)                | -87.35 (-148.31, -26.15) | ⊕⊕⊕○ Moderate Due to indirectness                        |
|                                                   | Switch_ARI_fixed_im<br>(2 RCTs, 76 participants)  | -52.74 (-112.00, 5.10)   | ⊕⊕○○ Low Due to indirectness and imprecision             |
|                                                   | Switch_ARI_fixed_ta<br>(3 RCTs, 273 participants) | -49.80 (-103.02, 2.45)   | ⊕⊕○○ Low Due to indirectness and imprecision             |
|                                                   | DA<br>(2 RCTs, 42 participants)                   | -32.73 (-83.62, 19.00)   | ⊕○○○ Very low Due to indirectness and severe imprecision |
| Reduction of prolactin level from baseline        | ARI_more_10mg<br>(1 RCT, 64 participants)         | -37.80 (-101.65, 27.22)  | ⊕⊕⊕○ Moderate Due to imprecision                         |
|                                                   | PGD<br>(2 RCTs, 81 participants)                  | -20.53 (-48.77, 8.11)    | ⊕⊕⊕○ Moderate Due to imprecision                         |

|                                                                            |                                                  |                          |                                                          |
|----------------------------------------------------------------------------|--------------------------------------------------|--------------------------|----------------------------------------------------------|
| (baseline PRL < 50 ng/ml)                                                  | ARI_5mg<br>(1 RCT, 65 participants)              | -38.94 (-103.39, 25.34)  | ⊕⊕○○ Low Due to indirectness and imprecision             |
|                                                                            | ARI_10mg<br>(2 RCTs, 84 participants)            | -38.30 (-88.17, 11.17)   | ⊕⊕○○ Low Due to indirectness and imprecision             |
|                                                                            | Switch_QUE<br>(1 RCT, 20 participants)           | -26.92 (-70.03, 15.57)   | ⊕⊕○○ Low Due to severe imprecision                       |
|                                                                            | Switch_ARI_ti_ta<br>(2 RCTs, 51 participants)    | -14.42 (-56.87, 27.00)   | ⊕⊕○○ Low Due to severe imprecision                       |
|                                                                            | MET<br>(1 RCT, 72 participants)                  | -1.10 (-42.33, 39.15)    | ⊕⊕○○ Low Due to severe imprecision                       |
|                                                                            | Switch_ARI_fixed_im<br>(2 RCTs, 76 participants) | -25.53 (-83.83, 30.66)   | ⊕○○○ Very low Due to indirectness and severe imprecision |
|                                                                            | Switch_ARI_fixed_ta<br>(2 RCTs, 73 participants) | -24.03 (-81.72, 32.19)   | ⊕○○○ Very low Due to indirectness and severe imprecision |
| Reduction of prolactin level from baseline (50 < baseline PRL < 100 ng/ml) | ARI_10mg<br>(5 RCTs, 247 participants)           | -61.42 (-84.81, -38.20)  | ⊕⊕⊕⊕ High                                                |
|                                                                            | ARI_more_10mg<br>(4 RCTs, 130 participants)      | -43.90 (-68.51, -19.22)  | ⊕⊕⊕⊕ High                                                |
|                                                                            | ARI_5mg<br>(4 RCTs, 171 participants)            | -43.84 (-66.85, -18.27)  | ⊕⊕⊕⊕ High                                                |
|                                                                            | VitB6<br>(1 RCT, 100 participants)               | -75.95 (-125.74, -26.13) | ⊕⊕⊕○ Moderate Due to indirectness                        |
|                                                                            | Switch_OLA<br>(1 RCT, 27 participants)           | -31.02 (-76.76, 15.06)   | ⊕⊕○○ Low Due to severe imprecision                       |

|                                                                       |                                               |                           |                                                                 |
|-----------------------------------------------------------------------|-----------------------------------------------|---------------------------|-----------------------------------------------------------------|
| Reduction of prolactin level from baseline (baseline PRL > 100 ng/ml) | ARI_5mg<br>(6 RCTs, 250 participants)         | -81.251 (-126.00, -35.45) | ⊕⊕⊕⊕ High                                                       |
|                                                                       | ARI_more_10mg<br>(2 RCTs, 39 participants)    | -79.72 (-165.17, 4.95)    | ⊕⊕⊕○ Moderate Due to imprecision                                |
|                                                                       | ARI_10mg<br>(1 RCT, 15 participants)          | -85.95 (-179.85, 8.92)    | ⊕⊕○○ Low Due to severe imprecision                              |
|                                                                       | MET<br>(1 RCT, 42 participants)               | -75.88 (-212.69, 62.80)   | ⊕⊕○○ Low Due to severe imprecision                              |
|                                                                       | PGD<br>(5 RCTs, 155 participants)             | -54.19 (-128.02, 19.11)   | ⊕⊕○○ Low Due to heterogeneity and imprecision                   |
|                                                                       | Switch_ARI_ti_ta<br>(2 RCTs, 52 participants) | -86.63 (-186.71, 12.77)   | ⊕○○○ Very low Due to risk of bias, indirectness and imprecision |
|                                                                       | DA<br>(2 RCTs, 42 participants)               | -58.43 (-163.32, 47.24)   | ⊕○○○ Very low Due to indirectness and severe imprecision        |
| Reduction of prolactin level from baseline (baseline PRL > 50 ng/ml)  | ARI_more_10 mg<br>(6 RCTs, 262 participants)  | -68.01 (-97.12, -39.72)   | ⊕⊕⊕⊕ High                                                       |
|                                                                       | ARI_5mg<br>(10 RCTs, 421 participants)        | -64.26 (-87.00, -41.37)   | ⊕⊕⊕⊕ High                                                       |
|                                                                       | ARI_10mg<br>(6 RCTs, 169 participants)        | -59.81 (-90.10, -29.76)   | ⊕⊕⊕⊕ High                                                       |
|                                                                       | VitB6<br>(1 RCT, 100 participants)            | -91.84 (-165.31, -17.74)  | ⊕⊕⊕○ Moderate Due to indirectness                               |
|                                                                       | MET<br>(1 RCT, 42 participants)               | -76.20 (-191.38, 37.08)   | ⊕⊕⊕○ Moderate Due to imprecision                                |

|                                               |                          |                                               |
|-----------------------------------------------|--------------------------|-----------------------------------------------|
| Switch_ARI_ti_ta<br>(2 RCTs, 52 participants) | -74.80 (-134.22, -15.99) | ⊕⊕○○ Low Due to risk of bias and indirectness |
| DA<br>(2 RCTs, 42 participants)               | -49.56 (-119.15, 18.69)  | ⊕⊕○○ Low Due to indirectness and imprecision  |
| PGD<br>(5 RCTs, 155 participants)             | -44.87 (-91.93, 2.17)    | ⊕⊕○○ Low Due to heterogeneity and imprecision |
| Switch_OLA<br>(1 RCT, 27 participants)        | -30.78 (-100.59, 39.34)  | ⊕⊕○○ Low Due to severe imprecision            |

ARI\_5mg, adjunctive 5mg aripiprazole; ARI\_10mg, adjunctive 10mg aripiprazole; ARI\_more\_10mg, adjunctive more than 10mg aripiprazole; DA, adjunctive dopamine agonist; MET, adjunctive metformin; PGD, adjunctive Peony-Glycyrrhiza decoction; switch\_ARI\_fixed\_im, switching to ARI with fixed dosage and reducing the previous antipsychotic immediately; switch\_ARI\_fixed\_ta, switching to ARI with fixed dosage and reducing the previous antipsychotic in tardation; switch\_ARI\_ti\_ta, switching to ARI in titration and reducing the previous antipsychotic in tardation; switch\_OLA, switching to olanzapine; switch\_QUE, switching to quetiapine; VitB6, adjunctive high-dose vitamin B6.

**Supplementary Table 2. Minimally contextualized framework**

|                                                                                |                  |                          |                                            |
|--------------------------------------------------------------------------------|------------------|--------------------------|--------------------------------------------|
| All strategies                                                                 |                  |                          |                                            |
| High certainly                                                                 | Intervention     | MD (95% CI)              | Surface under the cumulative ranking curve |
| category 2: among the most effective                                           |                  |                          |                                            |
| category 1: inferior to the most effective, or superior to the least effective | ARI              | -60.21 (-78.36, -41.89)  | 0.80                                       |
|                                                                                | Switching        | -38.23 (-68.76, -8.04)   | 0.54                                       |
| category 0: among the least effective                                          | PGD              | -26.77 (-56.82, 3.17)    | 0.38                                       |
|                                                                                | MET              | -18.49 (-75.91, 34.31)   | 0.32                                       |
| Low certainly                                                                  | Intervention     | MD (95% CI)              | Surface under the cumulative ranking curve |
| category 2: among the most effective                                           |                  |                          |                                            |
| category 1: inferior to the most effective, or superior to the least effective | VitB6            | -91.98 (-159.55, -25.78) | 0.93                                       |
| category 0: among the least effective                                          | DA               | -31.69 (-89.00, 25.92)   | 0.45                                       |
| All strategies divided based on dosage                                         |                  |                          |                                            |
| High certainly                                                                 | Intervention     | MD (95% CI)              | Surface under the cumulative ranking curve |
| category 2: among the most effective                                           | ARI_more_10mg    | -62.07 (-84.71, -39.59)  | 0.75                                       |
|                                                                                | ARI_5mg          | -61.21 (-80.23, -42.33)  | 0.74                                       |
| category 1: inferior to the most effective, or superior to the least effective | ARI_10mg         | -55.97 (-78.66, -33.14)  | 0.66                                       |
|                                                                                | Switch_ARI_ti_ta | -44.53 (-81.76, -7.98)   | 0.51                                       |

|                                                                                |                     |                          |                                            |
|--------------------------------------------------------------------------------|---------------------|--------------------------|--------------------------------------------|
|                                                                                | PGD                 | -27.84 (-55.23, -0.29)   | 0.31                                       |
| category 0: among the least effective                                          | Switch_OLA          | -31.11 (-90.13, 27.60)   | 0.39                                       |
|                                                                                | Switch_QUE          | -27.24 (-86.89, 32.31)   | 0.35                                       |
|                                                                                | MET                 | -16.62 (-68.67, 31.29)   | 0.25                                       |
| Low certainly                                                                  | Intervention        | MD (95% CI)              | Surface under the cumulative ranking curve |
| category 2: among the most effective                                           |                     |                          |                                            |
| category 1: inferior to the most effective, or superior to the least effective | VitB6               | -87.35 (-148.31, -26.15) | 0.89                                       |
| category 0: among the least effective                                          | Switch_ARI_fixed_im | -52.74 (-112.00, 5.10)   | 0.61                                       |
|                                                                                | Switch_ARI_fixed_ta | -49.80 (-103.02, 2.45)   | 0.58                                       |
|                                                                                | DA                  | -32.73 (-83.62, 19.00)   | 0.39                                       |
| PRL < 50 ng/ml                                                                 |                     |                          |                                            |
| High certainly                                                                 | Intervention        | MD (95% CI)              | Surface under the cumulative ranking curve |
| category 2: among the most effective                                           |                     |                          |                                            |
| category 1: inferior to the most effective, or superior to the least effective |                     |                          |                                            |
| category 0: among the least effective                                          | ARI_10mg            | -38.30 (-88.17, 11.17)   | 0.71                                       |
|                                                                                | PGD                 | -20.53 (-48.77, 8.11)    | 0.49                                       |
|                                                                                | Switch_QUE          | -26.92 (-70.03, 15.57)   | 0.59                                       |
|                                                                                | Switch_ARI_ti_ta    | -14.42 (-56.87, 27.00)   | 0.37                                       |
|                                                                                | MET                 | -1.10 (-42.33, 39.15)    | 0.20                                       |

|                                                                                |                     |                          |                                            |
|--------------------------------------------------------------------------------|---------------------|--------------------------|--------------------------------------------|
| Low certainly                                                                  | Intervention        | MD (95% CI)              | Surface under the cumulative ranking curve |
| category 2: among the most effective                                           |                     |                          |                                            |
| category 1: inferior to the most effective, or superior to the least effective |                     |                          |                                            |
| category 0: among the least effective                                          | ARI_5mg             | -38.94 (-103.39, 25.34)  | 0.70                                       |
|                                                                                | ARI_more_10mg       | -37.80 (-101.65, 27.22)  | 0.68                                       |
|                                                                                | Switch_ARI_fixed_im | -25.53 (-83.83, 30.66)   | 0.57                                       |
|                                                                                | Switch_ARI_fixed_ta | -24.03 (-81.72, 32.19)   | 0.54                                       |
| 50 ng/ml < PRL < 100 ng/ml                                                     |                     |                          |                                            |
| High certainly                                                                 | Intervention        | MD (95% CI)              | Surface under the cumulative ranking curve |
| category 2: among the most effective                                           |                     |                          |                                            |
| category 1: inferior to the most effective, or superior to the least effective | ARI_10mg            | -61.42 (-84.81, -38.20)  | 0.80                                       |
|                                                                                | ARI_more_10mg       | -43.90 (-68.51, -19.22)  | 0.48                                       |
|                                                                                | ARI_5mg             | -43.84 (-66.85, -18.27)  | 0.47                                       |
| category 0: among the least effective                                          | Switch_OLA          | -31.02 (-76.76, 15.06)   | 0.34                                       |
| Low certainly                                                                  | Intervention        | MD (95% CI)              | Surface under the cumulative ranking curve |
| category 2: among the most effective                                           |                     |                          |                                            |
| category 1: inferior to the most effective, or superior to the least effective | VitB6               | -75.95 (-125.74, -26.13) | 0.90                                       |
| PRL > 100 ng/ml                                                                |                     |                          |                                            |



|                                                                                |                  |                           |                                            |
|--------------------------------------------------------------------------------|------------------|---------------------------|--------------------------------------------|
| High certainly                                                                 | Intervention     | MD (95% CI)               | Surface under the cumulative ranking curve |
| category 2: among the most effective                                           |                  |                           |                                            |
| category 1: inferior to the most effective, or superior to the least effective | ARI_5mg          | -81.251 (-126.00, -35.45) | 0.63                                       |
| category 0: among the least effective                                          | ARI_10mg         | -85.95 (-179.85, 8.92)    | 0.65                                       |
|                                                                                | ARI_more_10mg    | -79.72 (-165.17, 4.95)    | 0.61                                       |
|                                                                                | MET              | -75.88 (-212.69, 62.80)   | 0.56                                       |
|                                                                                | PGD              | -54.19 (-128.02, 19.11)   | 0.39                                       |
| Low certainly                                                                  | Intervention     | MD (95% CI)               | Surface under the cumulative ranking curve |
| category 2: among the most effective                                           |                  |                           |                                            |
| category 1: inferior to the most effective, or superior to the least effective |                  |                           |                                            |
| category 0: among the least effective                                          | Switch_ARI_ti_ta | -86.63 (-186.71, 12.77)   | 0.66                                       |
|                                                                                | DA               | -58.43 (-163.32, 47.24)   | 0.45                                       |
| PRL > 50 ng/ml                                                                 |                  |                           |                                            |
| High certainly                                                                 | Intervention     | MD (95% CI)               | Surface under the cumulative ranking curve |
| category 2: among the most effective                                           |                  |                           |                                            |
| category 1: inferior to the most effective, or superior to the least effective | ARI_more_10mg    | -68.01 (-97.12, -39.72)   | 0.64                                       |
|                                                                                | ARI_5mg          | -64.26 (-87.00, -41.37)   | 0.59                                       |
|                                                                                | ARI_10mg         | -59.81 (-90.10, -29.76)   | 0.52                                       |

|                                                                                |                  |                          |                                            |
|--------------------------------------------------------------------------------|------------------|--------------------------|--------------------------------------------|
| category 0: among the least effective                                          | MET              | -76.20 (-191.38, 37.08)  | 0.63                                       |
|                                                                                | PGD              | -44.87 (-91.93, 2.17)    | 0.36                                       |
|                                                                                | Switch_OLA       | -30.78 (-100.59, 39.34)  | 0.28                                       |
| Low certainly                                                                  | Intervention     | MD (95% CI)              | Surface under the cumulative ranking curve |
| category 2: among the most effective                                           |                  |                          |                                            |
| category 1: inferior to the most effective, or superior to the least effective | VitB6            | -91.84 (-165.31, -17.74) | 0.79                                       |
|                                                                                | Switch_ARI_ti_ta | -74.80 (-134.22, -15.99) | 0.70                                       |
| category 0: among the least effective                                          | DA               | -49.56 (-119.15, 18.69)  | 0.44                                       |

PRL, prolactin; ARI\_5mg, adjunctive 5mg aripiprazole; ARI\_10mg, adjunctive 10mg aripiprazole; ARI\_more\_10mg, adjunctive more than 10mg aripiprazole; DA, adjunctive dopamine agonist; MET, adjunctive metformin; PGD, adjunctive Peony-Glycyrrhiza decoction; switch\_ARI\_fixed\_im, switching to ARI with fixed dosage and reducing the previous antipsychotic immediately; switch\_ARI\_fixed\_ta, switching to ARI with fixed dosage and reducing the previous antipsychotic in tardation; switch\_ARI\_ti\_ta, switching to ARI in titration and reducing the previous antipsychotic in tardation; switch\_OLA, switching to olanzapine; switch\_QUE, switching to quetiapine; VitB6, adjunctive high-dose vitamin B6.

**Supplementary Table 3. Risk of bias: RCT (ROB 2).**

| study                   | Randomization process | Deviation from intended interventions | Missing outcome | Measurement of the outcome | Selection of the reported result | over all Bias | weight |
|-------------------------|-----------------------|---------------------------------------|-----------------|----------------------------|----------------------------------|---------------|--------|
| Byerly MJ et al., 2008  | Some concerns         | Low                                   | Low             | Low                        | Low                              | Some concerns | 42     |
| Byerly MJ et al., 2009  | Some concerns         | Low                                   | Low             | Low                        | Low                              | Some concerns | 105    |
| Chen HM et al., 2016    | Low                   | Low                                   | Low             | Low                        | Low                              | Low           | 61     |
| Chen HZ et al., 2009    | Low                   | Low                                   | Low             | Low                        | Low                              | Low           | 65     |
| Chen JX et.al., 2014    | Some concerns         | Low                                   | Low             | Low                        | Low                              | Some concerns | 116    |
| Chen JX et.al., 2015    | Some concerns         | Low                                   | Low             | Low                        | Low                              | Some concerns | 120    |
| Gu P et.al., 2016       | Low                   | Low                                   | Low             | Low                        | Low                              | Low           | 120    |
| Huang P et.al., 2011    | Some concerns         | Low                                   | Low             | Low                        | Low                              | Some concerns | 66     |
| Hwang TJ et.al., 2015   | Low                   | Low                                   | Low             | Low                        | Low                              | Low           | 79     |
| Ji JY et.al., 2008      | Low                   | Low                                   | Low             | Low                        | Low                              | Low           | 117    |
| Kelly DL et.al., 2018   | Some concerns         | Low                                   | Low             | Low                        | Low                              | Some concerns | 42     |
| Kinon BJ et.al, 2006    | Some concerns         | Low                                   | Low             | Low                        | Low                              | Some concerns | 54     |
| Lee BJ et.al., 2013     | Some concerns         | Low                                   | Low             | Low                        | Low                              | Some concerns | 29     |
| Liang J et.al., 2014    | Low                   | Low                                   | Low             | Low                        | Low                              | Low           | 40     |
| Liu ZB et.al., 2011     | Some concerns         | Low                                   | Low             | Some concerns              | Some concerns                    | Some concerns | 142    |
| Man SC et.al., 2016     | Low                   | Low                                   | Low             | Low                        | Low                              | Low           | 99     |
| Qiao Y et.al., 2016     | Some concerns         | Low                                   | Low             | Low                        | Low                              | Some concerns | 60     |
| Ryckmans V et.al., 2009 | Some concerns         | Low                                   | Low             | Low                        | Low                              | Some concerns | 400    |
| Shim JC et.al., 2007    | Some concerns         | Low                                   | Low             | Low                        | Low                              | Some concerns | 54     |
| Wang HL et.al., 2014    | Low                   | Low                                   | Low             | Low                        | Low                              | Low           | 178    |
| Wu RR et.al., 2012      | Low                   | Low                                   | Low             | Low                        | Low                              | Low           | 84     |

|                       |               |     |     |               |     |               |     |
|-----------------------|---------------|-----|-----|---------------|-----|---------------|-----|
| Xia JX et.al., 2011   | Some concerns | Low | Low | Low           | Low | Some concerns | 143 |
| Xia SY et.al., 2014   | Low           | Low | Low | Low           | Low | Low           | 67  |
| Xu CX et.al., 2015    | Low           | Low | Low | Low           | Low | Low           | 193 |
| Xu LP et.al., 2006    | Some concerns | Low | Low | Low           | Low | Some concerns | 60  |
| Yang P et.al., 2017   | Some concerns | Low | Low | Low           | Low | Some concerns | 41  |
| Yoon HW et.al., 2016  | Some concerns | Low | Low | Low           | Low | Some concerns | 42  |
| Yu RL et.al., 2010    | Some concerns | Low | Low | Some concerns | Low | Some concerns | 63  |
| Yuan et.al., 2008     | Some concerns | Low | Low | Low           | Low | Some concerns | 20  |
| Zhang LG et.al., 2018 | Low           | Low | Low | Low           | Low | Low           | 58  |
| Zhuo CJ et.al., 2021  | Low           | Low | Low | Low           | Low | Low           | 194 |

RoB 2, Cochrane Risk of Bias tool 2.

**Supplementary Table 4. Risk of bias: non-RCT (MINORS).**

| study                      | A clearly stated aim | Inclusion of consecutive patients | Prospective collection of data | Endpoint appropriate for aim of study | Unbiased assessment of study endpoint | Follow-up period appropriate | Loss of follow-up less than 5% | Prospective calculation of study size |
|----------------------------|----------------------|-----------------------------------|--------------------------------|---------------------------------------|---------------------------------------|------------------------------|--------------------------------|---------------------------------------|
| Yoon HW et.al. 2016        | 2                    | 2                                 | 2                              | 2                                     | 2                                     | 1                            | 0                              | 0                                     |
| Chen CY et.al. 2011        | 2                    | 1                                 | 2                              | 2                                     | 2                                     | 1                            | 2                              | 0                                     |
| Lu ML et.al. 2008          | 2                    | 2                                 | 2                              | 2                                     | 2                                     | 1                            | 2                              | 0                                     |
| Lee BH et.al. 2006         | 2                    | 2                                 | 2                              | 2                                     | 2                                     | 1                            | 0                              | 0                                     |
| Nakajima M et.al. 2005     | 2                    | 1                                 | 2                              | 2                                     | 2                                     | 1                            | 0                              | 0                                     |
| Takahashi H et.al 2003     | 2                    | 0                                 | 2                              | 2                                     | 2                                     | 1                            | 1                              | 0                                     |
| Kawabe et al. 2013         | 2                    | 0                                 | 2                              | 2                                     | 2                                     | 1                            | 2                              | 0                                     |
| Hatzimanolis J et.al. 1998 | 2                    | 2                                 | 2                              | 2                                     | 2                                     | 1                            | 1                              | 0                                     |
| Markianos M et.al. 1999    | 2                    | 2                                 | 2                              | 2                                     | 2                                     | 1                            | 1                              | 0                                     |

|                            |   |   |   |   |   |   |   |   |
|----------------------------|---|---|---|---|---|---|---|---|
| Kim KS et.al. 2002         | 2 | 2 | 2 | 2 | 2 | 1 | 0 | 0 |
| Ryckmans V et.al. 2009     | 2 | 2 | 2 | 2 | 2 | 1 | 2 | 2 |
| Takeuchi H et.al. 2010     | 2 | 1 | 2 | 2 | 2 | 1 | 1 | 0 |
| Byerly MJ et.al. 2009      | 2 | 1 | 2 | 2 | 2 | 1 | 0 | 0 |
| Woo Y.S. et al. 2016       | 2 | 1 | 2 | 2 | 2 | 1 | 2 | 0 |
| Kelly DL et.al. 2021       | 2 | 1 | 2 | 2 | 2 | 1 | 2 | 0 |
| Woo Y.S. et.al. 2019       | 2 | 2 | 2 | 2 | 2 | 1 | 1 | 0 |
| Ichinose M et.al. 2021     | 2 | 1 | 2 | 2 | 2 | 1 | 0 | 0 |
| Kinon, BJ et al. 2000      | 2 | 1 | 2 | 2 | 2 | 1 | 0 | 0 |
| Montejo A.L. et al. 2009   | 2 | 1 | 2 | 2 | 2 | 1 | 2 | 0 |
| Huang P et.al. 2011        | 2 | 2 | 2 | 2 | 2 | 1 | 2 | 0 |
| Jen Y.W. et.al. 2020       | 2 | 2 | 2 | 2 | 2 | 1 | 0 | 0 |
| Takeuchi H et al. 2008     | 2 | 2 | 2 | 2 | 2 | 1 | 2 | 0 |
| Hwang TJ et.al. 2015       | 2 | 2 | 1 | 2 | 2 | 1 | 2 | 0 |
| Kim SW et.al. 2009         | 2 | 1 | 2 | 2 | 2 | 1 | 2 | 0 |
| Nishimoto M et.al. 2012    | 2 | 1 | 2 | 2 | 2 | 1 | 0 | 0 |
| Hashimoto N et.al. 2015    | 2 | 1 | 2 | 2 | 2 | 1 | 1 | 0 |
| Fujioi J et al. 2017       | 2 | 2 | 2 | 2 | 2 | 1 | 2 | 0 |
| Zhao J et al. 2015         | 2 | 2 | 2 | 2 | 2 | 1 | 2 | 0 |
| Ziadi Trives M et al. 2013 | 2 | 1 | 2 | 2 | 2 | 1 | 0 | 0 |
| Van Kooten M et al. 2011   | 2 | 2 | 2 | 2 | 2 | 1 | 0 | 0 |
| Yasui-Furukori et al. 2010 | 2 | 1 | 2 | 2 | 2 | 1 | 2 | 0 |
| Chen CK et al. 2010        | 2 | 2 | 2 | 2 | 2 | 1 | 2 | 0 |
| Chen JX et al. 2009        | 2 | 2 | 2 | 2 | 2 | 1 | 2 | 0 |
| Arnaiz A et.al. 2021       | 2 | 0 | 2 | 2 | 2 | 1 | 1 | 0 |

|                              |   |   |   |   |   |   |   |   |
|------------------------------|---|---|---|---|---|---|---|---|
| Raveendranthan D et al. 2018 | 2 | 0 | 2 | 2 | 2 | 1 | 1 | 0 |
| Wang HL et al. 2014          | 2 | 2 | 2 | 2 | 2 | 1 | 2 | 0 |
| Xia SY et al. 2014           | 2 | 2 | 2 | 2 | 2 | 1 | 2 | 0 |
| Xu CX et al. 2015            | 2 | 2 | 2 | 2 | 2 | 1 | 2 | 0 |
| Jung DU et.al. 2011          | 2 | 1 | 2 | 2 | 2 | 1 | 1 | 0 |
| Sajeev Kumar PB et.al. 2010  | 2 | 0 | 2 | 2 | 2 | 1 | 2 | 0 |
| Kalkavoura et.al. 2013       | 2 | 2 | 2 | 2 | 2 | 1 | 2 | 0 |
| Coronas et.al. 2012          | 2 | 2 | 2 | 2 | 2 | 1 | 2 | 0 |
| Cavallaro et.al. 2004        | 2 | 1 | 2 | 2 | 2 | 1 | 2 | 0 |
| Yuan et.al. 2008             | 2 | 2 | 2 | 2 | 2 | 1 | 2 | 0 |
| Bliesener et.al. 2004        | 2 | 0 | 2 | 2 | 2 | 1 | 2 | 0 |
| Hashimoto et.al. 2014        | 2 | 2 | 2 | 2 | 2 | 1 | 2 | 0 |
| Siever LJ et.al. 1981        | 2 | 1 | 2 | 2 | 2 | 1 | 2 | 0 |
| Cohn JB et.al. 1985          | 2 | 0 | 2 | 2 | 2 | 1 | 2 | 0 |
| Yu RL et al. 2010            | 2 | 2 | 2 | 2 | 2 | 1 | 2 | 0 |

MINORS, Methodological Index for Non-Randomized Studies.

0, not report; 1, report but inadequate; 2, Report and adequate.
